# Supplementary material for: Dynamic Responses of Ground-Dwelling Invertebrate Communities to Disturbance in Forest Ecosystems
Source: MDPI journal article supplement (doi:10.3390/insects10030061), 2019-02-26
Supplement: s1 [file s1]

## Supplementary Materials

**Table S1.** Summary of studies investigating the effects of canopy gap formation, coarse woody debris (CWD) accumulation, and salvage harvesting in forest ecosystems. Response variables of ground-dwelling invertebrates were abundance (A), richness (R), evenness (E), diversity (D), and biomass (B). Effects of canopy gaps, CWD, and salvage logging on ground-dwelling invertebrates are represented as positive (+), negative (-), or no effect ( $\approx$ ) ( $\alpha \leq 0.05$ ); the absence of a symbol indicates the factor was not directly investigated in the study.

| Taxon       | Order, Family, and/or Subfamily | Response Measured | Disturbance Type |                    | Study Location | Canopy    | CWD       | Salvage   | Reference                  |
|-------------|---------------------------------|-------------------|------------------|--------------------|----------------|-----------|-----------|-----------|----------------------------|
| Annelida    |                                 | A                 | Insect           | Emerald ash borer  | Michigan       |           | +         |           | Ulyshen et al. [101]       |
|             |                                 | A                 | Wind             | Tornado, Salvage   | Pennsylvania   | $\approx$ | $\approx$ | $\approx$ | Perry [127]                |
| Gastropoda  |                                 | A                 | Insect           | Emerald ash borer  | Ohio           |           | +         |           | Perry and Herms [50]       |
|             |                                 | A                 | Insect           | Emerald ash borer  | Michigan       | $\approx$ | $\approx$ |           | Perry and Herms [98]       |
|             |                                 | A                 | Wind             | Tornado, Salvage   | Pennsylvania   | $\approx$ | $\approx$ | +         | Perry [127]                |
| Chilopoda   |                                 | A                 | Insect           | Emerald ash borer  | Michigan       | $\approx$ | $\approx$ |           | Ulyshen et al. [101]       |
|             |                                 | A                 | Insect           | Emerald ash borer  | Ohio           | $\approx$ | $\approx$ |           | Perry and Herms [50]       |
|             |                                 | A                 | Wind, Human      | Windstorm, Salvage | Slovakia       | +         | $\approx$ | +         | Urbanovičová et al. [158]  |
|             | Scolopendromorpha               | A                 | Wind             | Tornado, Salvage   | Pennsylvania   | -         | -         |           | Perry [127]                |
|             | Scolopendromorpha               | A, B              | Wind, Human      | Hurricane, Salvage | North Carolina | -         |           |           | Greenberg and Forrest [39] |
|             | Lithobiomorpha                  | A                 | Wind             | Tornado, Salvage   | Pennsylvania   | $\approx$ | $\approx$ | $\approx$ | Perry [127]                |
| Diplopoda   |                                 | A                 | Insect           | Emerald ash borer  | Michigan       |           | +         |           | Ulyshen et al. [101]       |
|             |                                 | A                 | Wind             | Hurricane          | Puerto Rico    | -         | $\approx$ |           | Richardson et al. [41]     |
|             |                                 | A                 | Wind, Human      | Windstorm, Salvage | Slovakia       | +         | $\approx$ | +         | Urbanovičová et al. [158]  |
|             | Chordeumatida, Caseyidae        | A                 | Wind             | Tornado, Salvage   | Pennsylvania   | $\approx$ | $\approx$ | -         | Perry [127]                |
|             | Julida                          | A, B              | Wind, Human      | Hurricane, Salvage | North Carolina | -         |           |           | Greenberg and Forrest [39] |
|             | Julida, Julidae                 | A                 | Wind             | Tornado, Salvage   | Pennsylvania   | -         | -         | -         | Perry [127]                |
|             | Julida, Parajulidae             | A                 | Wind             | Tornado, Salvage   | Pennsylvania   | $\approx$ | $\approx$ | -         | Perry [127]                |
|             | Polydesmida                     | A                 | Insect           | Emerald ash borer  | Ohio           | +         |           |           | Perry and Herms [50]       |
|             | Polydesmida                     | A                 | Insect           | Emerald ash borer  | Michigan       | $\approx$ | $\approx$ |           | Perry and Herms [98]       |
|             | Polydesmida                     | A, B              | Wind, Human      | Hurricane, Salvage | North Carolina | $\approx$ | $\approx$ | $\approx$ | Greenberg and Forrest [39] |
|             | Polydesmida, Paradoxosomatidae  | A                 | Wind             | Tornado, Salvage   | Pennsylvania   | $\approx$ | $\approx$ | $\approx$ | Perry [127]                |
|             | Polydesmida, Polydesmidae       | A                 | Wind             | Tornado, Salvage   | Pennsylvania   | $\approx$ | $\approx$ | $\approx$ | Perry [127]                |
| Spirobolida |                                 | A, B              | Wind, Human      | Hurricane, Salvage | North Carolina | -         |           |           | Greenberg and Forrest [39] |
|             | Spirobolida, Spirobolidae       | A                 | Insect           | Emerald ash borer  | Michigan       | $\approx$ | +         |           | Perry and Herms [98]       |
|             | Spirobolida, Spirobolidae       | A                 | Wind             | Tornado, Salvage   | Pennsylvania   | +         | +         | +         | Perry [127]                |
|             |                                 |                   |                  |                    |                |           |           |           |                            |
| Isopoda     |                                 | A                 | Insect           | Emerald ash borer  | Ohio           |           | +         |           | Perry and Herms [50]       |
|             |                                 | A                 | Insect           | Emerald ash borer  | Michigan       |           | +         |           | Ulyshen et al. [101]       |
|             |                                 | A                 | Insect           | Emerald ash borer  | Michigan       | $\approx$ | +         |           | Perry and Herms [98]       |
|             |                                 | A                 | Wind             | Hurricane          | Puerto Rico    | -         | $\approx$ |           | Richardson et al. [41]     |
|             |                                 | A                 | Wind             | Tornado, Salvage   | Pennsylvania   | $\approx$ | $\approx$ | $\approx$ | Perry [127]                |
|             |                                 | A                 | Wind, Human      | Windstorm, Salvage | Slovakia       | $\approx$ | $\approx$ | $\approx$ | Urbanovičová et al. [158]  |
| Acari       |                                 | A                 | Insect           | Emerald ash borer  | Michigan       | $\approx$ | $\approx$ |           | Ulyshen et al. [101]       |
|             |                                 | A                 | Wind             | Hurricane          | Puerto Rico    | +         | $\approx$ |           | Richardson et al. [41]     |
|             |                                 | A, B              | Wind, Human      | Hurricane, Salvage | North Carolina | $\approx$ | $\approx$ | $\approx$ | Greenberg and Forrest [39] |
|             |                                 | A                 | Wind, Human      | Windstorm, Salvage | Slovakia       | +         | $\approx$ | +         | Urbanovičová et al. [158]  |
| Araneae     |                                 | A                 | Insect           | Emerald ash borer  | Michigan       |           | +         |           | Ulyshen et al. [101]       |
|             |                                 | A                 | Insect           | Emerald ash borer  | Ohio           | $\approx$ | $\approx$ |           | Perry and Herms [50]       |
|             |                                 | A                 | Insect           | Emerald ash borer  | Michigan       | $\approx$ | $\approx$ |           | Perry and Herms [98]       |

|                  |                 |         |             |                           |                |   |   |   |                                  |
|------------------|-----------------|---------|-------------|---------------------------|----------------|---|---|---|----------------------------------|
|                  |                 | A       | Wind        | Tornado, Salvage          | Pennsylvania   | + | + | + | Perry [127]                      |
|                  |                 | A, R    | Wind, Human | Windstorm, Salvage        | Switzerland    | + | + | + | Wermelinger et al. [160]         |
|                  |                 | D       | Wind, Human | Windstorm, Salvage        | Switzerland    | + | - | + | Wermelinger et al. [160]         |
|                  |                 | A       | Wind, Human | Windstorm, Salvage        | Slovakia       | + | ≈ | + | Urbanovičová et al. [158]        |
|                  |                 | A       | Human       | Experimental, Emulate HWA | Massachusetts  | + | ≈ | ≈ | Sackett et al. [105]             |
|                  |                 | R       | Human       | Experimental, Emulate HWA | Massachusetts  | + | ≈ | ≈ | Sackett et al. [105]             |
|                  |                 | A, R    | Human       | Experimental, Salvage     | Germany        | + | ≈ | ≈ | Thorn et al. [163]               |
|                  | Atypidae        | A, B    | Wind, Human | Hurricane, Salvage        | North Carolina | - |   |   | Greenberg and Forrest [39]       |
|                  | Gnaphosidae     | A, B    | Wind, Human | Hurricane, Salvage        | North Carolina | ≈ | ≈ | ≈ | Greenberg and Forrest [39]       |
|                  | Lycosidae       | A, B    | Wind, Human | Hurricane, Salvage        | North Carolina | ≈ | ≈ | ≈ | Greenberg and Forrest [39]       |
|                  | Pisauridae      | A, B    | Wind, Human | Hurricane, Salvage        | North Carolina | - |   |   | Greenberg and Forrest [39]       |
|                  | Thomisidae      | A, B    | Wind, Human | Hurricane, Salvage        | North Carolina | - |   |   | Greenberg and Forrest [39]       |
| Opiliones        |                 |         |             |                           |                |   |   |   |                                  |
|                  |                 | A       | Insect      | Emerald ash borer         | Ohio           | - |   |   | Perry and Herms [50]             |
|                  |                 | A       | Insect      | Emerald ash borer         | Michigan       | ≈ | - |   | Perry and Herms [98]             |
|                  |                 | A       | Insect      | Emerald ash borer         | Michigan       |   | + |   | Ulyshen et al. [101]             |
|                  |                 | A       | Wind        | Tornado, Salvage          | Pennsylvania   | + | + | + | Perry [127]                      |
|                  |                 | A       | Wind, Human | Windstorm, Salvage        | Slovakia       | - | ≈ | - | Urbanovičová et al. [158]        |
|                  |                 | A, R    | Human       | Experimental, Salvage     | Germany        | ≈ | ≈ | ≈ | Thorn et al. [163]               |
|                  | Sclerosomatidae | A, B    | Wind, Human | Hurricane, Salvage        | North Carolina | + |   | + | Greenberg and Forrest [39]       |
| Pseudoscorpiones |                 |         |             |                           |                |   |   |   |                                  |
|                  |                 | A       | Insect      | Emerald ash borer         | Michigan       | ≈ | ≈ |   | Ulyshen et al. [101]             |
|                  |                 | A       | Wind        | Tornado, Salvage          | Pennsylvania   | ≈ | ≈ | ≈ | Perry [127]                      |
|                  |                 | A       | Wind, Human | Windstorm, Salvage        | Slovakia       | ≈ | ≈ | ≈ | Urbanovičová et al. [158]        |
| Diplura          |                 |         |             |                           |                |   |   |   |                                  |
|                  |                 | A       | Wind, Human | Windstorm, Salvage        | Slovakia       | ≈ | ≈ | ≈ | Urbanovičová et al. [158]        |
| Collembola       |                 |         |             |                           |                |   |   |   |                                  |
|                  |                 | A       | Insect      | Emerald ash borer         | Michigan       |   | + |   | Ulyshen et al. [101]             |
|                  |                 | A       | Insect      | Emerald ash borer         | Michigan       | ≈ | + |   | Perry and Herms [98]             |
|                  |                 | A       | Wind        | Hurricane                 | Puerto Rico    | + |   |   | Richardson et al. [41]           |
|                  |                 | A       | Wind, Human | Windstorm, Salvage        | Slovakia       | + | ≈ | + | Urbanovičová et al. [158]        |
|                  | Onychiuridae    | A       | Wind        | Tornado, Salvage          | Pennsylvania   | ≈ | ≈ | ≈ | Perry [127]                      |
|                  | Hypogastruridae | A       | Insect      | Emerald ash borer         | Ohio           | - |   |   | Perry and Herms [50]             |
|                  | Hypogastruridae | A       | Wind        | Tornado, Salvage          | Pennsylvania   | ≈ | ≈ | ≈ | Perry [127]                      |
|                  | Isotomidae      | A       | Insect      | Emerald ash borer         | Ohio           | - |   |   | Perry and Herms [50]             |
|                  | Isotomidae      | A       | Wind        | Tornado, Salvage          | Pennsylvania   | ≈ | ≈ | ≈ | Perry [127]                      |
|                  | Sminthuridae    | A       | Insect      | Emerald ash borer         | Ohio           | - |   |   | Perry and Herms [50]             |
|                  | Tomoceridae     | A       | Insect      | Emerald ash borer         | Ohio           | ≈ | ≈ |   | Perry and Herms [50]             |
|                  | Tomoceridae     | A       | Wind        | Tornado, Salvage          | Pennsylvania   | ≈ | ≈ | ≈ | Perry [127]                      |
|                  | Entomobryidae   | A       | Insect      | Emerald ash borer         | Ohio           | ≈ | ≈ |   | Perry and Herms [50]             |
|                  | Entomobryidae   | A       | Wind, Human | Tornado, Salvage          | Pennsylvania   | ≈ | ≈ | - | Perry [127]                      |
|                  | Dicyrtomidae    | A       | Wind, Human | Tornado, Salvage          | Pennsylvania   | ≈ | ≈ | - | Perry [127]                      |
|                  | Katiannidae     | A       | Wind, Human | Tornado, Salvage          | Pennsylvania   | ≈ | ≈ | - | Perry [127]                      |
|                  | Neanuridae      | A       | Wind, Human | Tornado, Salvage          | Pennsylvania   | ≈ | ≈ | ≈ | Perry [127]                      |
| Coleoptera       |                 |         |             |                           |                |   |   |   |                                  |
|                  |                 | A       | Insect      | Emerald ash borer         | Michigan       |   | + |   | Ulyshen et al. [101]             |
|                  |                 | R       | Insect      | Emerald ash borer         | Michigan       |   | + |   | Ulyshen et al. [101]             |
|                  |                 | A       | Wind, Human | Windstorm, Salvage        | Switzerland    | ≈ |   | ≈ | Wermelinger et al. [160]         |
|                  |                 | R       | Wind, Human | Windstorm, Salvage        | Switzerland    | + | + | + | Wermelinger et al. [160]         |
|                  |                 | D       | Wind, Human | Windstorm, Salvage        | Switzerland    | + | ≈ | + | Wermelinger et al. [160]         |
|                  |                 | A       | Human       | Experimental, Emulate HWA | Massachusetts  | - | ≈ | ≈ | Sackett et al. [105]             |
|                  |                 | R       | Human       | Experimental, Emulate HWA | Massachusetts  | ≈ | ≈ | ≈ | Sackett et al. [105]             |
|                  | Carabidae       | A, R, D | Insect      | Emerald ash borer         | Michigan       | - |   |   | Gandhi et al. [92]               |
|                  | Carabidae       | A       | Insect      | Emerald ash borer         | Ohio           | - |   |   | Perry and Herms [50]             |
|                  | Carabidae       | A       | Insect      | Emerald ash borer         | Ohio           | - |   |   | Perry and Herms [40]             |
|                  | Carabidae       | A       | Insect      | Emerald ash borer         | Michigan       | ≈ | ≈ |   | Perry and Herms [98]             |
|                  | Carabidae       | A, R,   | Wind        | Tornado                   | Illinois       | ≈ | ≈ |   | Barber and Widick [132]          |
|                  | Carabidae       | D, C    | Wind        | Tornado                   | Illinois       | + | + |   | Barber and Widick [132]          |
|                  | Carabidae       | A       | Wind        | Hurricane                 | Poland         | - | - |   | Skłodowski and Garbalińska [134] |

|             |                            |      |             |                           |                |   |   |   |                                  |
|-------------|----------------------------|------|-------------|---------------------------|----------------|---|---|---|----------------------------------|
|             | Carabidae                  | R    | Wind        | Hurricane                 | Poland         | + | + |   | Skłodowski and Garbalińska [134] |
|             | Carabidae                  | R    | Wind        | Tornado                   | Poland         | + | + |   | Skłodowski and Garbalinska [131] |
|             | Carabidae                  | A    | Wind, Human | Windstorm, Salvage        | Minnesota      | - | - | - | Gandhi et al. [53]               |
|             | Carabidae                  | R, D | Wind, Human | Windstorm, Salvage        | Minnesota      | + | + | + | Gandhi et al. [53]               |
|             | Carabidae                  | A    | Wind, Human | Tornado, Salvage          | Pennsylvania   | + | + | + | Perry [127]                      |
|             | Carabidae                  | A    | Wind, Human | Windstorm, Salvage        | Slovakia       | - | ≈ | - | Urbanovičová et al. [158]        |
|             | Carabidae                  | A    | Wind, Human | Hurricane, Salvage        | North Carolina | - |   |   | Greenberg and Forrest [39]       |
|             | Carabidae                  | B    | Wind, Human | Hurricane, Salvage        | North Carolina | + | ≈ | ≈ | Greenberg and Forrest [39]       |
|             | Carabidae                  | A    | Human       | Experimental, Salvage     | Germany        | ≈ | ≈ | ≈ | Thorn et al. [163]               |
|             | Carabidae                  | R    | Human       | Experimental, Salvage     | Germany        | - | ≈ | ≈ | Thorn et al. [163]               |
|             | Carabidae                  | A, R | Fire, Human | Wildfire, Salvage         | Canada         | + |   | + | Koivula and Spence [162]         |
|             | Carabidae                  | A    | Fire, Human | Wildfire, Salvage         | Canada         |   |   | + | Phillips et al. [161]            |
|             | Carabidae                  | D    | Fire, Human | Wildfire, Salvage         | Canada         |   |   | ≈ | Phillips et al. [161]            |
|             | Curculionidae              | A    | Wind, Human | Tornado, Salvage          | Pennsylvania   | ≈ | ≈ | ≈ | Perry [127]                      |
|             | Curculionidae              | A, B | Wind, Human | Hurricane, Salvage        | North Carolina | ≈ | ≈ | ≈ | Greenberg and Forrest [39]       |
|             | Curculionidae              | A    | Wind, Human | Windstorm, Salvage        | Slovakia       | - | ≈ | - | Urbanovičová et al. [158]        |
|             | Curculionidae, Scolytinae  | A    | Wind        | Tornado, Salvage          | Pennsylvania   | + | + | ≈ | Perry [127]                      |
|             | Elateridae                 | A, B | Wind, Human | Hurricane, Salvage        | North Carolina | ≈ | ≈ | ≈ | Greenberg and Forrest [39]       |
|             | Geotrupidae                | A    | Wind        | Tornado, Salvage          | Pennsylvania   | - | - | - | Perry [127]                      |
|             | Histeridae                 | A    | Wind        | Tornado, Salvage          | Pennsylvania   | ≈ | ≈ | ≈ | Perry [127]                      |
|             | Histeridae                 | A, B | Wind, Human | Hurricane, Salvage        | North Carolina | ≈ | ≈ | ≈ | Greenberg and Forrest [39]       |
|             | Nitidulidae                | A    | Insect      | Emerald ash borer         | Ohio           | ≈ | ≈ |   | Perry and Herms [50]             |
|             | Nitidulidae                | A    | Insect      | Emerald ash borer         | Michigan       | ≈ | ≈ |   | Perry and Herms [98]             |
|             | Nitidulidae                | A    | Wind        | Tornado, Salvage          | Pennsylvania   | ≈ | ≈ | ≈ | Perry [127]                      |
|             | Phalacrididae              | A    | Wind        | Tornado, Salvage          | Pennsylvania   | ≈ | + | ≈ | Perry [127]                      |
|             | Ptilidae                   | A    | Wind        | Tornado, Salvage          | Pennsylvania   | ≈ | + | ≈ | Perry [127]                      |
|             | Scarabaeidae               | A    | Insect      | Emerald ash borer         | Ohio           | ≈ | - |   | Perry and Herms [50]             |
|             | Scarabaeidae               | A    | Insect      | Emerald ash borer         | Michigan       | ≈ | ≈ |   | Perry and Herms [98]             |
|             | Scarabaeidae               | A    | Wind        | Tornado, Salvage          | Pennsylvania   | ≈ | ≈ | ≈ | Perry [127]                      |
|             | Scarabaeidae               | A, B | Wind, Human | Hurricane, Salvage        | North Carolina | ≈ | ≈ | ≈ | Greenberg and Forrest [39]       |
|             | Scarabaeidae               | A    | Wind, Human | Windstorm, Salvage        | Slovakia       | - | ≈ | - | Urbanovičová et al. [158]        |
|             | Scarabaeidae, Aphodinae    | A    | Wind        | Tornado, Salvage          | Pennsylvania   | - | - | - | Perry [127]                      |
|             | Scarabaeidae, Scarabaeinae | A    | Wind        | Tornado, Salvage          | Pennsylvania   | ≈ | ≈ | + | Perry [127]                      |
|             | Silphidae                  | A    | Insect      | Emerald ash borer         | Ohio           | ≈ | ≈ |   | Perry and Herms [50]             |
|             | Silphidae                  | A    | Insect      | Emerald ash borer         | Michigan       | ≈ | ≈ |   | Perry and Herms [98]             |
|             | Silphidae                  | A    | Wind        | Tornado, Salvage          | Pennsylvania   | ≈ | ≈ | ≈ | Perry [127]                      |
|             | Silphidae                  | A, B | Wind, Human | Hurricane, Salvage        | North Carolina | ≈ | ≈ | ≈ | Greenberg and Forrest [39]       |
|             | Staphylinidae              | A    | Insect      | Emerald ash borer         | Ohio           | ≈ | ≈ |   | Perry and Herms [50]             |
|             | Staphylinidae              | A    | Insect      | Emerald ash borer         | Michigan       | ≈ | ≈ |   | Perry and Herms [98]             |
|             | Staphylinidae              | A    | Wind        | Tornado, Salvage          | Pennsylvania   | ≈ | + | ≈ | Perry [127]                      |
|             | Staphylinidae              | A, B | Wind, Human | Hurricane, Salvage        | North Carolina | ≈ | ≈ | ≈ | Greenberg and Forrest [39]       |
|             | Staphylinidae              | A    | Wind, Human | Windstorm, Salvage        | Slovakia       | - | ≈ | - | Urbanovičová et al. [158]        |
|             | Tenebrionidae              | A, B | Wind, Human | Hurricane, Salvage        | North Carolina | ≈ | ≈ | ≈ | Greenberg and Forrest [39]       |
| Diptera     |                            | A    | Insect      | Emerald ash borer         | Michigan       | ≈ | ≈ |   | Ulyshen et al. [101]             |
| Hymenoptera |                            | A    | Wind, Human | Windstorm, Salvage        | Slovakia       | ≈ | ≈ | ≈ | Urbanovičová et al. [158]        |
|             | Formicidae                 | A    | Insect      | Emerald ash borer         | Michigan       | ≈ | ≈ |   | Ulyshen et al. [101]             |
|             | Formicidae                 | A    | Insect      | Emerald ash borer         | Ohio           | ≈ | ≈ |   | Perry and Herms [50]             |
|             | Formicidae                 | A    | Insect      | Emerald ash borer         | Michigan       | ≈ | ≈ |   | Perry and Herms [98]             |
|             | Formicidae                 | A, R | Insect      | Hemlock woolly adelgid    | Massachusetts  | + |   | + | Kendrick et al. [103]            |
|             | Formicidae                 | A    | Wind        | Tornado, Salvage          | Pennsylvania   | + | + | + | Perry [127]                      |
|             | Formicidae                 | A    | Wind        | Hurricane                 | Puerto Rico    | ≈ | ≈ |   | Richardson et al. [41]           |
|             | Formicidae                 | R    | Wind        | Storms, Temporales        | Costa Rica     | + |   |   | Patrick et al. [128]             |
|             | Formicidae                 | A, B | Wind, Human | Hurricane, Salvage        | North Carolina | ≈ | ≈ | ≈ | Greenberg and Forrest [39]       |
|             | Formicidae                 | A    | Human       | Experimental, Emulate HWA | Massachusetts  | + | ≈ | ≈ | Sackett et al. [105]             |
|             | Formicidae                 | R    | Human       | Experimental, Emulate HWA | Massachusetts  | + | ≈ | ≈ | Sackett et al. [105]             |
|             | Formicidae                 | E, D | Human       | Experimental, Emulate HWA | Massachusetts  | + |   |   | Record et al. [106]              |
|             | Formicidae                 | A, R | NA          | Canopy Gap                | Panama         | ≈ |   |   | Feener and Schupp [130]          |

|            |                  |         |             |                    |                   |   |   |   |                            |
|------------|------------------|---------|-------------|--------------------|-------------------|---|---|---|----------------------------|
|            | Formicidae       | A, R    | NA, Human   | NA, Salvage        | India             | + |   | + | Basu [129]                 |
| Hemiptera  |                  | A       | Insect      | Emerald ash borer  | Michigan          | ≈ | ≈ |   | Ulyshen et al. [101]       |
|            |                  | A       | Wind        | Hurricane          | Puerto Rico       | - |   |   | Richardson et al. [41]     |
|            |                  | A, B    | Wind, Human | Hurricane, Salvage | North Carolina    | ≈ | ≈ | ≈ | Greenberg and Forrest [39] |
|            |                  | A, R, D | Wind, Human | Windstorm, Salvage | Switzerland       | + | ≈ | + | Wermelinger et al. [160]   |
| Blattodea  | Blattellidae     | A, B    | Wind, Human | Hurricane, Salvage | North Carolina    | ≈ | ≈ | ≈ | Greenberg and Forrest [39] |
|            | Cryptoceridae    | A, B    | Wind, Human | Hurricane, Salvage | North Carolina    | ≈ | ≈ | ≈ | Greenberg and Forrest [39] |
| Orthoptera | Acridae          | A, B    | Wind, Human | Hurricane, Salvage | North Carolina    | ≈ | ≈ | ≈ | Greenberg and Forrest [39] |
|            | Gryllidae        | A       | Insect      | Emerald ash borer  | Ohio              | ≈ | ≈ |   | Perry and Herms [50]       |
|            | Gryllidae        | A       | Insect      | Emerald ash borer  | Michigan          | ≈ | ≈ |   | Perry and Herms [98]       |
|            | Gryllidae        | A       | Wind        | Tornado, Salvage   | Pennsylvania      | + | ≈ | + | Perry [127]                |
|            | Gryllidae        | A, B    | Wind, Human | Hurricane, Salvage | North Carolina    |   |   | + | Greenberg and Forrest [39] |
|            | Gryllacrididae   | A, B    | Wind, Human | Hurricane, Salvage | North Carolina    | ≈ | ≈ | ≈ | Greenberg and Forrest [39] |
|            | Rhaphidophoridae | A       | Insect      | Emerald ash borer  | Ohio              | - |   |   | Perry and Herms [50]       |
|            | Rhaphidophoridae | A       | Insect      | Emerald ash borer  | Michigan          | ≈ | ≈ |   | Perry and Herms [98]       |
|            | Rhaphidophoridae | A       | Wind        | Tornado, Salvage   | Pennsylvania      | ≈ | ≈ | ≈ | Perry [127]                |
| Psocoptera |                  | A       | Insect      | Emerald ash borer  | Michigan          | + |   |   | Ulyshen et al. [101]       |
|            |                  | A       | Wind        | Hurricane          | Puerto Rico       | + |   |   | Richardson et al. [41]     |
|            |                  | A       | Wind, Human | Windstorm, Salvage | Slovakia          | ≈ | ≈ | ≈ | Urbanovičová et al. [158]  |
| Community  |                  | R, D    | Insect      | Emerald ash borer  | Ohio              | - |   |   | Perry and Herms [50]       |
|            |                  | A       | Insect      | Emerald ash borer  | Ohio              | ≈ | ≈ |   | Perry and Herms [50]       |
|            |                  | A, E, D | Insect      | Emerald ash borer  | Michigan          | ≈ | ≈ |   | Perry and Herms [98]       |
|            |                  | R       | Insect      | Emerald ash borer  | Michigan          | ≈ | + |   | Perry and Herms [98]       |
|            |                  | R,E     | Insect      | Beech Bark Disease | New York, Vermont | ≈ |   |   | Garneau et al. [112]       |
|            |                  | A       | Wind        | Tornado, Salvage   | Pennsylvania      | + | + | + | Perry [127]                |
|            |                  | R, E, D | Wind        | Tornado, Salvage   | Pennsylvania      | + | + | ≈ | Perry [127]                |
|            |                  | A       | Wind        | Hurricane          | Puerto Rico       | ≈ | ≈ |   | Richardson et al. [41]     |
|            |                  | B, D    | Wind        | Hurricane          | Puerto Rico       | - |   |   | Richardson et al. [41]     |
|            |                  | A, B    | Wind, Human | Hurricane, Salvage | North Carolina    | - |   |   | Greenberg and Forrest [39] |
|            |                  | A       | Wind, Human | Windstorm, Salvage | Slovakia          | + | ≈ | + | Urbanovičová et al. [158]  |
|            |                  | E, D    | Wind, Human | Windstorm, Salvage | Slovakia          | - | ≈ | - | Urbanovičová et al. [158]  |
